# Supplementary material for: Clinical sequencing of soft tissue and bone sarcomas delineates diverse genomic landscapes and potential therapeutic targets
Source: bioRxiv or medRxiv preprint supplement (doi:10.1101/2021.10.28.21265587), 2021-10-30
Supplement: Supplementary file [file media-1.pdf]

|                  | <b>SAMPLES</b> | <b>AGE</b>       |              | <b>SEX</b>  |               | <b>SAMPLE TYPE</b> |                |
|------------------|----------------|------------------|--------------|-------------|---------------|--------------------|----------------|
|                  | <b>Count</b>   | <b>Mean ± SD</b> | <b>Range</b> | <b>Male</b> | <b>Female</b> | <b>Metastatic</b>  | <b>Primary</b> |
| <b>TOTAL</b>     | 2138           | 49.3 ± 20.0      | 0–90         | 1040        | 1098          | 790                | 1348           |
| <b>GIST</b>      | 395            | 58.5 ± 14.2      | 11–90        | 213         | 182           | 123                | 272            |
| <b>DDL5</b>      | 167            | 62.1 ± 11.7      | 29–90        | 115         | 52            | 58                 | 109            |
| <b>ULMS</b>      | 165            | 57.2 ± 10.3      | 30–83        | 0           | 165           | 91                 | 74             |
| <b>UPS</b>       | 145            | 55.6 ± 18.1      | 3–87         | 74          | 71            | 52                 | 93             |
| <b>OS</b>        | 129            | 26.1 ± 16.6      | 8–78         | 79          | 50            | 52                 | 77             |
| <b>LMS</b>       | 125            | 57.8 ± 14.6      | 7–83         | 49          | 76            | 71                 | 54             |
| <b>ANGS</b>      | 101            | 58.6 ± 16.7      | 15–89        | 41          | 60            | 24                 | 77             |
| <b>ES</b>        | 99             | 26.9 ± 16.1      | 2–79         | 60          | 39            | 28                 | 71             |
| <b>SYNS</b>      | 74             | 40.7 ± 16.0      | 7–85         | 36          | 38            | 24                 | 50             |
| <b>DSRCT</b>     | 53             | 23.4 ± 9.4       | 8–48         | 48          | 5             | 24                 | 29             |
| <b>SFT</b>       | 52             | 60.2 ± 11.0      | 39–80        | 25          | 27            | 22                 | 30             |
| <b>MPNST</b>     | 50             | 43.7 ± 20.2      | 11–89        | 30          | 20            | 12                 | 38             |
| <b>MRLS</b>      | 48             | 44.7 ± 13.4      | 13–67        | 29          | 19            | 16                 | 32             |
| <b>WDLS</b>      | 48             | 57.8 ± 9.9       | 34–74        | 27          | 21            | 25                 | 23             |
| <b>ERMS</b>      | 43             | 15.5 ± 16.8      | 1–70         | 20          | 23            | 7                  | 36             |
| <b>CHS</b>       | 41             | 47.9 ± 15.4      | 16–76        | 26          | 15            | 16                 | 25             |
| <b>MFS</b>       | 38             | 64.5 ± 12.6      | 31–80        | 21          | 17            | 13                 | 25             |
| <b>RCS_other</b> | 35             | 27.8 ± 18.0      | 0–70         | 14          | 21            | 3                  | 32             |
| <b>PECOMA</b>    | 30             | 55.9 ± 15.0      | 14–76        | 7           | 23            | 15                 | 15             |
| <b>ARMS</b>      | 29             | 23.5 ± 16.4      | 1–67         | 16          | 13            | 13                 | 16             |
| <b>EPIS</b>      | 29             | 38.5 ± 15.2      | 16–67        | 14          | 15            | 9                  | 20             |
| <b>PLLS</b>      | 22             | 53.0 ± 18.9      | 12–87        | 10          | 12            | 8                  | 14             |
